# Supplementary material for: A highly specific graphene platform for sensing collagen triple helix
Source: Royal Society of Chemistry journal article supplement (doi:10.1039/c5tb02218e), 2015-12-23
Supplement: c5tb02218e1.pdf [file c5tb02218e1.pdf]

## Supporting Materials

### A Highly Specific Graphene Platform for Sensing Collagen Triple Helix

Xiuxia Sun, Jun Fan, Weiran Ye, Han Zhang, Yong Cong, Jianxi Xiao

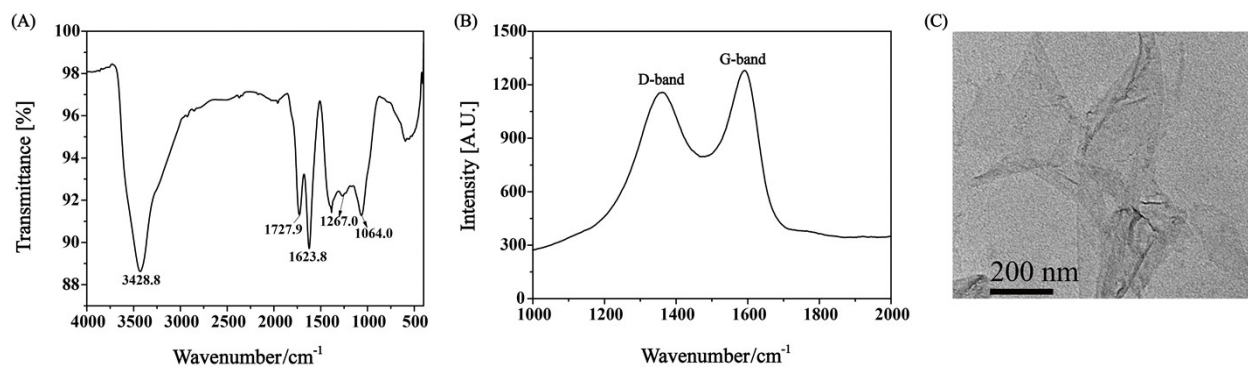

**Figure S1.** Characterization of GO. FTIR spectrum (A), Raman spectrum (B) and TEM image (C) were measured for GO. The FTIR spectrum showed the characteristic vibrations of GO: 3428.8 cm<sup>-1</sup> (O-H bond), 1727.9 cm<sup>-1</sup> (C=O bond), 1623.8 cm<sup>-1</sup> (the bonds of the unoxidized graphitic skeletal domains), and 1064 cm<sup>-1</sup> (C-O bond). The Raman spectrum displayed a strong peak corresponding to the vibration of sp<sup>2</sup>-bonded carbon atoms (G band) and another strong peak resulting from the vibration of carbon atoms with dangling bonds (D band). The TEM image showed a typical layered structure of GO.
